# Supplementary material for: A non-canonical striatopallidal Go pathway that supports motor control
Source: PubMed Central journal article supplement (PMC10593790; doi:10.1038/s41467-023-42288-1), 2023-10-23
Supplement: 41467_2023_42288_MOESM3_ESM.pdf [file 41467_2023_42288_MOESM3_ESM.pdf]

## Description of Additional Supplementary Files

**Supplementary Dataset 1.** Summary table giving list and reference for all reagents and equipment used

**Supplementary Dataset 2.** Summary table giving statistical analyses and results for each Figure

**Supplementary Video 1. dSPN terminal calcium dynamics in the GPe and SNr and mouse speed during open field locomotion.** A cre-dependent jGCaMP7s calcium indicator was used in *Drd1*-cre mice. Mouse speed is smoothed in 2-sec bins.

**Supplementary Video 2. dSPN terminal calcium dynamics in the GPe and SNr and mouse behavior during a rotarod task.** A cre-dependent jGCaMP7s calcium indicator was used in *Drd1*-cre mice. Position of the mouse's lower body in the Y axis allows to track jumps during running.

**Supplementary Video 3. Representative video showing mouse speed before and after optogenetic inhibition of dSPN terminals in the GPe in an open field.** The cre-dependent eOPN3 inhibitory opsin was used in *Drd1*-cre mice.

**Supplementary Video 4. Representative video showing GPe *Npas1* calcium dynamics and mouse speed before and after optogenetic stimulation of dSPN GPe axons in an open field.** Cre-dependent GCaMP6s calcium indicator and ChrimsonR activating opsin were used in *Drd1*-cre;*Npas1*-cre mice. Mouse speed is smoothed in 2-sec bins.
